# Supplementary material
Source: PubMed Central journal article supplement (PMC4001459)
Supplement: jbjs_96_9_770_ds01.pdf [file jbjs_96_9_770_ds01.pdf]

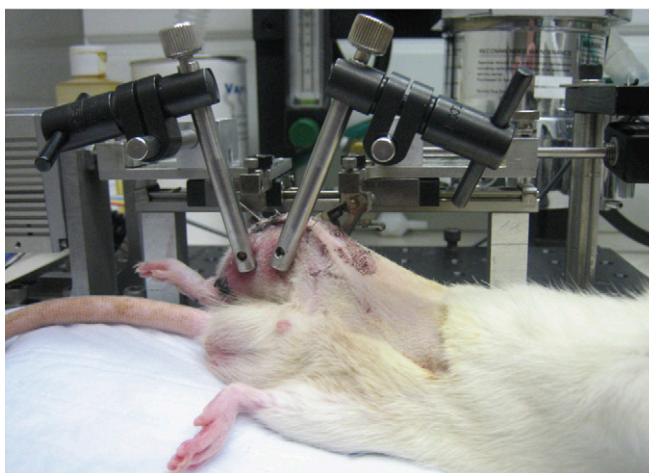

Fig. E-1A

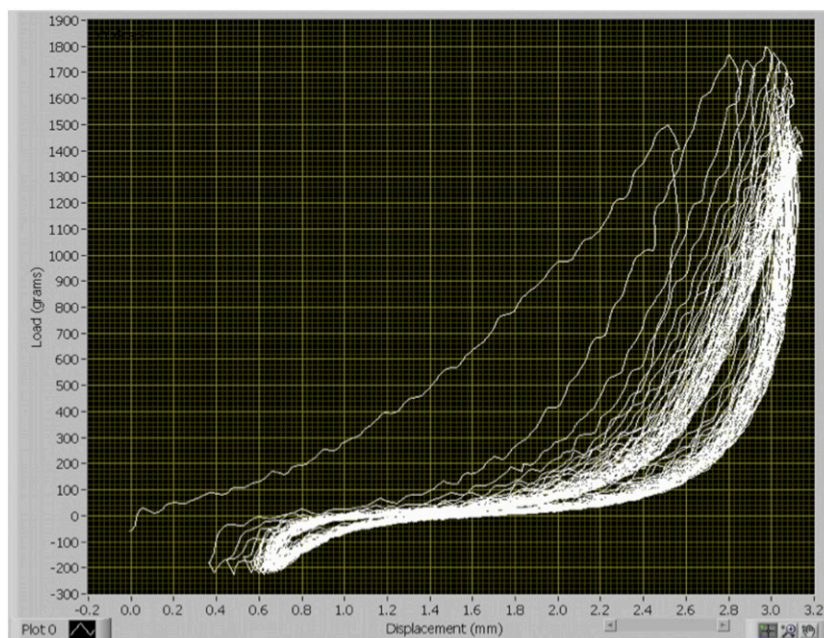

Fig. E-1B

**Fig. E-1A** Illustration of the loading device, which utilized both lateral and medial attachments to the external fixator pins. The load-displacement graph (**Fig. E-1B**) was displayed on a computer with use of LabVIEW 7.0 (National Instruments, Austin, Texas). At the beginning of all loading sessions, the joint was compressed to 1.96 N (200 g) to establish a reproducible starting position. Rats underwent fifty cycles of either 10% strain or 2400 g of load per loading session.

| TABLE E-1 Loading Results in Each Animal on Each Postoperative Day*                                                               |       |       |       |       |       |       |       |       |       |        |        |        |        |                   |    |
|-----------------------------------------------------------------------------------------------------------------------------------|-------|-------|-------|-------|-------|-------|-------|-------|-------|--------|--------|--------|--------|-------------------|----|
|                                                                                                                                   | Day 1 | Day 2 | Day 3 | Day 4 | Day 5 | Day 6 | Day 7 | Day 8 | Day 9 | Day 10 | Day 11 | Day 12 | Day 13 | Total No. of Days |    |
|                                                                                                                                   |       |       |       |       |       |       |       |       |       |        |        |        |        | L                 | D  |
| <b>Delayed-loading group</b>                                                                                                      |       |       |       |       |       |       |       |       |       |        |        |        |        |                   |    |
| Animal 1                                                                                                                          |       |       |       | D     | D     | L     | D     | D     | L     | L      | D      | L      | L      | 5                 | 5  |
| Animal 2                                                                                                                          |       |       |       | D     | D     | D     | L     | L     | L     | L      | L      | L      | L      | 7                 | 3  |
| Animal 3                                                                                                                          |       |       |       | D     | D     | D     | D     | D     | L     | D      | D      | L      | L      | 3                 | 7  |
| Animal 4                                                                                                                          |       |       |       | L     | D     | D     | L     | L     | L     | D      | L      | L      | L      | 7                 | 3  |
| Animal 5                                                                                                                          |       |       |       | D     | D     | D     | D     | D     | D     | D      | D      | D      | L      | 1                 | 9  |
| Animal 6                                                                                                                          |       |       |       | D     | D     | D     | L     | D     | D     | L      | L      | D      | L      | 4                 | 6  |
| Animal 7                                                                                                                          |       |       |       | D     | D     | D     | L     | L     | L     | L      | L      | L      | D      | 6                 | 4  |
| Animal 8                                                                                                                          |       |       |       | D     | D     | D     | L     | L     | L     | L      | D      | D      | D      | 4                 | 6  |
| Animal 9                                                                                                                          |       |       |       | L     | L     | L     | L     | L     | L     | L      | L      | L      | L      | 10                | 0  |
| Animal 10                                                                                                                         |       |       |       | D     | D     | L     | L     | L     | L     | L      | L      | L      | L      | 8                 | 2  |
| Animal 11                                                                                                                         |       |       |       | D     | D     | D     | D     | D     | D     | D      | D      | D      | L      | 1                 | 9  |
| <b>Immediate-loading group</b>                                                                                                    |       |       |       |       |       |       |       |       |       |        |        |        |        |                   |    |
| Animal 1                                                                                                                          | L     | L     | L     | L     | L     | L     | L     | L     | L     | L      | L      | L      | L      | 13                | 0  |
| Animal 2                                                                                                                          | D     | D     | D     | L     | L     | L     | L     | L     | L     | D      | L      | L      | L      | 9                 | 4  |
| Animal 3                                                                                                                          | D     | D     | D     | D     | D     | L     | L     | L     | D     | D      | D      | D      | D      | 3                 | 10 |
| Animal 4                                                                                                                          | D     | D     | L     | L     | L     | L     | L     | L     | L     | L      | L      | L      | L      | 11                | 2  |
| Animal 5                                                                                                                          | D     | D     | D     | D     | D     | D     | L     | D     | D     | L      | L      | D      | D      | 3                 | 10 |
| Animal 6                                                                                                                          | L     | L     | L     | L     | L     | L     | L     | L     | L     | L      | L      | L      | L      | 13                | 0  |
| Animal 7                                                                                                                          | D     | D     | D     | D     | D     | D     | D     | D     | L     | D      | D      | L      | L      | 3                 | 10 |
| *The knee joint was distracted until the graft reached either the 10% strain displacement limit (D) or the 2400-g load limit (L). |       |       |       |       |       |       |       |       |       |        |        |        |        |                   |    |
